# Supplementary material for: Ecofriendly Synthesis of Magnetic Composites Loaded on Rice Husks for Acid Blue 25 Decontamination: Adsorption Kinetics, Thermodynamics, and Isotherms
Source: MDPI journal article supplement (doi:10.3390/molecules28207124), 2023-10-17
Supplement: s1 [file s1]

# Ecofriendly Synthesis of Magnetic Composites Loaded on Rice Husks for Acid Blue 25 Decontamination: Adsorption Kinetics, Thermodynamics, and Isotherms

## SUPPLEMENTARY DATA

**Table S1.** Equations used for Calculation of Thermodynamic Parameters

| Thermodynamics             | (Equation)                                   | Plot              | Reference |
|----------------------------|----------------------------------------------|-------------------|-----------|
| $\Delta G^\circ$ (KJ/mol)  | $\Delta G^\circ = -RT \ln K_L$               | 1/T vs. $\ln K_L$ | [1]       |
| $\Delta H^\circ$ (KJ/mol)  | $\Delta H^\circ = -\text{slope} \times R$    |                   | [1]       |
| $\Delta S^\circ$ (J/K*mol) | $\Delta S^\circ = \text{intercept} \times R$ |                   |           |

**Table S2.** Isothermal Models and Equations Applied on Adsorption of Acid Blue 25

| Adsorption Isotherms        |                                                                 |                                                                                                                                      |                                     |           |
|-----------------------------|-----------------------------------------------------------------|--------------------------------------------------------------------------------------------------------------------------------------|-------------------------------------|-----------|
|                             | Linear Form                                                     | Non-Linear Form                                                                                                                      | Plot                                | Reference |
| <b>Freundlich</b>           | $\ln(q_e) = \ln K_F + \left(\frac{1}{n}\right) \times \ln(C_e)$ | $q_e = K_F C_e^{1/n}$                                                                                                                | $\ln q_e$ vs. $\ln C_e$             | [2]       |
| <b>Langmuir-I</b>           | $q_e = \frac{q_{mL} \cdot K_L \cdot C_e}{1 + K_L \cdot C_e}$    | $\frac{C_e}{q_e} = \frac{1}{q_{mL}} C_e + \frac{1}{q_{mL} K_L}$                                                                      | $\frac{C_e}{q_e}$ vs. $C_e$         | [2]       |
| <b>Langmuir-II</b>          | -                                                               | $\frac{1}{q_e} = \frac{1}{q_{mL} K_L} \left(\frac{1}{C_e}\right) + \frac{1}{q_{mL}}$                                                 | $\frac{1}{q_e}$ vs. $\frac{1}{C_e}$ |           |
| <b>Langmuir-III</b>         | -                                                               | $q_e = q_{mL} - \left(\frac{1}{K_L}\right) \frac{q_e}{C_e}$                                                                          | $q_e$ vs. $\frac{q_e}{C_e}$         |           |
| <b>Langmuir-IV</b>          | -                                                               | $\frac{q_e}{C_e} = K_L q_{mL} - K_L q_e$                                                                                             | $\frac{q_e}{C_e}$ vs. $q_e$         |           |
| <b>Dubinin-Radushkevich</b> | $\ln q_e = \ln q_{mDR} - K_{DR} \varepsilon^2$                  | $q_e = q_{mDR} e^{-K_{DR} \varepsilon^2}$<br>$\varepsilon = RT \ln \left(1 + \frac{1}{C_e}\right)$<br>$E = \frac{1}{\sqrt{2K_{DR}}}$ | $\ln q_e$ vs. $\varepsilon^2$       | [3]       |
| <b>Temkin</b>               | $q_e = \frac{RT}{B_T} \ln K_T + \frac{RT}{B_T} \ln C_e$         | $q_e = \frac{RT}{B_T} \ln K_T C_e$                                                                                                   | $q_e$ vs. $\ln C_e$                 | [4]       |

**Table S3.** Kinetic Models Applied on Adsorption of Acid Blue 25

| <b>Adsorption Kinetic Models</b>                                          |        |                                                                                             |                          |
|---------------------------------------------------------------------------|--------|---------------------------------------------------------------------------------------------|--------------------------|
| <b>Pseudo Second Order</b>                                                |        | <b>Equation</b>                                                                             | <b>Plot</b>              |
| <b>Linear Forms</b>                                                       | Type 1 | $\frac{t}{q_t} = \frac{1}{k_2 q_e^2} + \left(\frac{1}{q_e}\right) t$                        | $t/q_t$ vs. $t$          |
|                                                                           | Type2  | $\frac{1}{q_t} = \left(\frac{1}{k_2 q_e^2}\right) \frac{1}{t} + \left(\frac{1}{q_e}\right)$ | $1/q_t$ vs. $1/t$        |
|                                                                           | Type 3 | $\frac{q_t}{t} = k q_e^2 - k q_e q_t$                                                       | $q_t/t$ vs. $q_t$        |
|                                                                           | Type 4 | $q_t = q_e - \left(\frac{1}{k q_e}\right) \frac{q_t}{t}$                                    | $q_t$ vs. $q_t/t$        |
| <b>Pseudo Second Order (Non-Linear Form)</b>                              |        | $q_t = \frac{k_2 q_e^2 t}{1 + k_2 q_e t}$                                                   | $1/q_t$ vs. $1/t$        |
| <b>Pseudo First Order (Linear Form)</b>                                   |        | $\ln(q_e - q_t) = \ln(q_e) - k_1 t$                                                         | $\ln(q_e - q_t)$ vs. $t$ |
| <b>Pseudo First Order (Non-Linear Form)</b>                               |        | $q_t = q_e (1 - e^{-k_1 t})$                                                                | $q_t$ vs. $t$            |
| <b>Intraparticle Diffusion Kinetic Model (Linear and Non-Linear Form)</b> |        | $q_t = K_{Diff} t^{1/2} + C$                                                                | $q_t$ vs. $t^{1/2}$      |
| <b>Elovich Kinetic Model (Linear Form)</b>                                |        | $q_t = \frac{1}{\beta} \ln(\alpha\beta) + \frac{1}{\beta} \ln t$                            | $q_t$ vs. $\ln t$        |
| <b>Elovich Kinetic Model (Non-Linear Form)</b>                            |        | $q_t = \frac{1}{\beta} \ln(\alpha\beta t + 1)$                                              | $q_t$ vs. $t$            |

[5]

[6]

[7]

[8]

[5]

[9]

**Table S4.** Chemicals and Equipment used for the Work

| Chemical/Equipment                   | Make                                         |
|--------------------------------------|----------------------------------------------|
| FeCl <sub>3</sub> .6H <sub>2</sub> O | Sigma Aldrich, Germany                       |
| NaOH                                 | BDH                                          |
| Millipore water                      | Sigma Aldrich, Germany                       |
| Acid Blue 25                         | Sigma Aldrich, Germany                       |
| TGA                                  | Schimidzu (model = SDT Q 600 V8.2 Build 100) |
| FTIR                                 | Model Shimadzu AIM-8800                      |
| SEM                                  | JEOL model 2300                              |

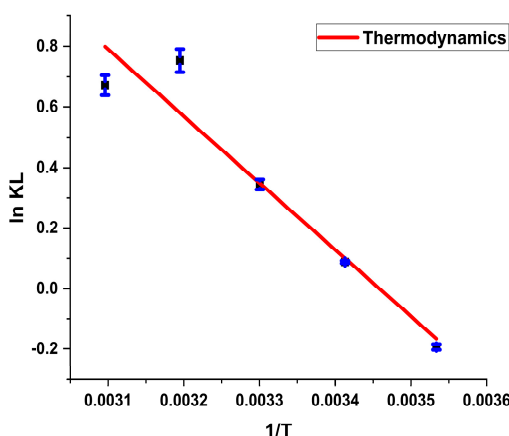

**Figure S1.** Thermodynamics for Acid Blue 25

#### REFERENCES

1. Sundaramurthy, S.; Srivastava, V.; Mishra, I., Isotherm, Thermodynamics, Desorption, and Disposal Study for the Adsorption of Catechol and Resorcinol onto Granular Activated Carbon. *J. Chem. Eng. Data.* **2011**, 56, 811-818.
2. Salih, S.; Anwer, S.; Faraj, R., Biosorption of mercury from wastewater using isolated *Aspergillus* sp. modified 1,10 Phenanthroline: Hill isotherm model. *Sci. j. Univ. Zakho* . 2017, 288-295.
3. Bayuo, J.; Pelig-Ba, K.; Abukari, M., Isotherm Modeling Of Lead (II) Adsorption From Aqueous Solution Using Groundnut Shell As A Low-Cost Adsorbent. *IOSR j. appl. chem.* 2018, 11, 18-23.
4. Shafiq, M.; Alazba, P.; Amin, M., Kinetic and Isotherm Studies of Ni<sup>2+</sup> and Pb<sup>2+</sup> Adsorption from Synthetic Wastewater Using *Eucalyptus camdulensis*—Derived Biochar. *Sustainability* 2021, 13, 3785.
5. Oboh, I.; Aluyor, E.; Audu, T., Second-order kinetic model for the adsorption of divalent metal ions on *Sida acuta* leaves. *Int J Phys Sci* 2013, 8, 1722-1728.
6. Zafar, S.; Khalid, N.; Daud, M.; Mirza, M., Kinetic Studies of the Adsorption of Thorium Ions onto Rice Husk from Aqueous Media: Linear and Nonlinear Approach. *The Nucleus*. 2015, 52, 14-19.
7. Abbas, M., Application of Used Tea Leaves for Multi Functions. 2014, II II.

8. Yu, T.; Liang, S.; Shang, X. In Kinetic and thermodynamic study of Am(III) sorption on Na-bentonite: Comparison of linear and non-linear methods. *Indian J. Chem. Technol.* 2017, 24, 123-133.
9. Benmessaoud, A.; Djamel, N.; Mekatel, E. H.; Samira, A., A Comparative Study of the Linear and Non-Linear Methods for Determination of the Optimum Equilibrium Isotherm for Adsorption of Pb 2+ Ions onto Algerian Treated Clay. *Iran. J. Chem. Chem. Eng.* 2020, 39, 153.
